# Supplementary material for: All-Cause Mortality Trends in a Large Population-Based Cohort With Long-Standing Childhood-Onset Type 1 Diabetes
Source: Oxford University Press journal article supplement (doi:10.2337/dc10-1170), 2010-11-29

**Supplemental Table 1.** Adjusted risk of overall mortality in the Allegheny County type 1 diabetes registry cohort with age at onset and diagnosis year as categorized and continuous variables.

|                         | Categorical  |           |         |
|-------------------------|--------------|-----------|---------|
|                         | Adjusted HR  | 95% CI    | p-value |
| <b>Female</b>           | Not selected | ---       | ---     |
| <b>African American</b> | 3.16         | 2.25–4.43 | <0.001  |
| <b>Age at onset</b>     |              |           | 0.001   |
| <10 yrs (Ref)           | 1.00         | ---       | ---     |
| 10-14 yrs               | 1.54         | 1.16–2.05 | 0.003   |
| >14 yrs                 | 1.75         | 1.29–2.37 | <0.001  |
| <b>Diagnosis cohort</b> |              |           | 0.003   |
| 1965-1969               | 1.69         | 1.22–2.35 | 0.002   |
| 1970-1974               | 1.20         | 0.86–1.69 | 0.29    |
| 1975-1979 (Ref)         | 1.00         | ---       | ---     |

  

|                               | Continuous   |           |         |
|-------------------------------|--------------|-----------|---------|
|                               | Adjusted HR  | 95% CI    | p-value |
| <b>Female</b>                 | Not selected | ---       | ---     |
| <b>African American</b>       | 3.17         | 2.26–4.44 | <0.001  |
| <b>Age at onset (yr)</b>      | 1.07         | 1.04–1.10 | <0.001  |
| <b>Year of diagnosis (yr)</b> | 0.94         | 0.91–0.97 | <0.001  |

**Supplemental Table 2.** 30-yr standardized mortality ratios (SMRs) by sex, race, age at onset, and diagnosis cohorts

|                         | SMR        | 95% CI         |
|-------------------------|------------|----------------|
| <b>Overall</b>          | <b>7.4</b> | <b>6.4–8.4</b> |
| <b>Sex</b>              |            |                |
| Males                   | 5.0        | 4.0–6.0        |
| Females                 | 13.2       | 10.7–15.7      |
| <b>Race</b>             |            |                |
| Caucasian               | 7.4        | 6.3–8.5        |
| African American        | 7.5        | 4.9–10.1       |
| <b>Age at onset</b>     |            |                |
| <10 yrs                 | 6.2        | 4.4–7.9        |
| 10-14 yrs               | 9.2        | 7.3–11.1       |
| >14 yrs                 | 6.6        | 5.0–8.2        |
| <b>Diagnosis cohort</b> |            |                |
| 1965–1969               | 9.3        | 7.2–11.3       |
| 1970–1974               | 7.5        | 5.8–9.2        |
| 1975–1979               | 5.6        | 4.0–7.2        |

**Supplemental Figure 1.** Life-table analyses by diagnosis cohort stratified by sex and race for individuals diagnosed with type 1 diabetes between 1965 and 1979 in the Allegheny County type 1 diabetes registry cohort. *P*-values calculated using the log-rank test. A) Males by Diagnosis cohort; B) Females by Diagnosis cohort; C) Caucasian by Diagnosis cohort; D) African-American by Diagnosis cohort. A: 1965–69 vs. 1970–74,  $p=0.04$ , and 1965–69 vs. 1975–79,  $p=0.02$ . No statistical differences seen in B, C, or D.

Figure 1A

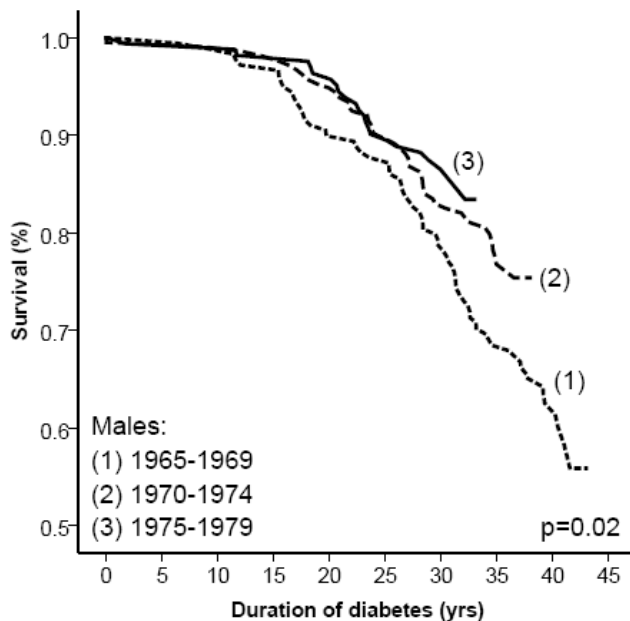

Figure 1B

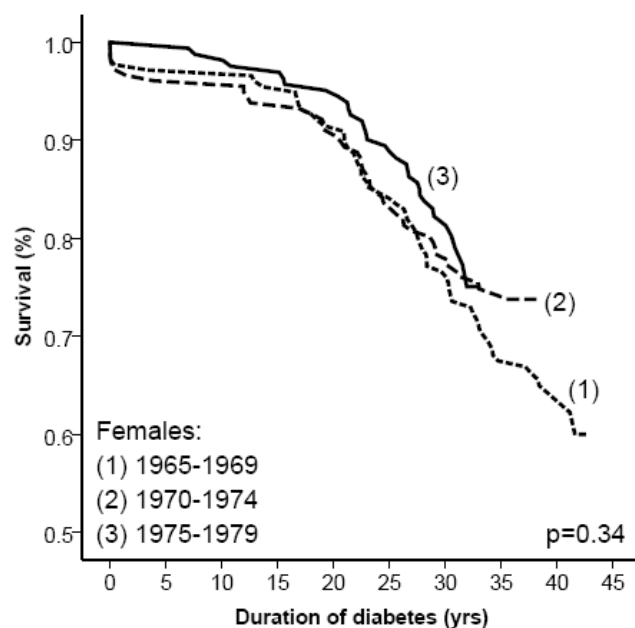

Figure 1C

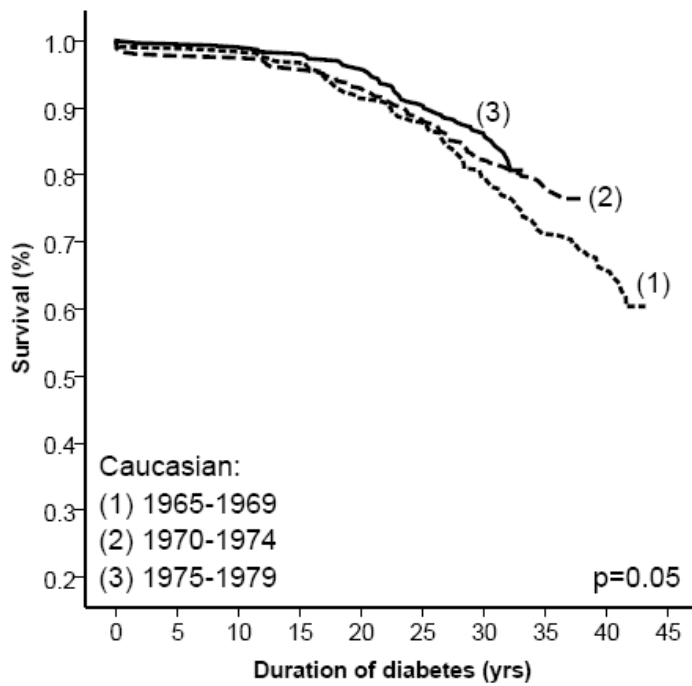

Figure 1D

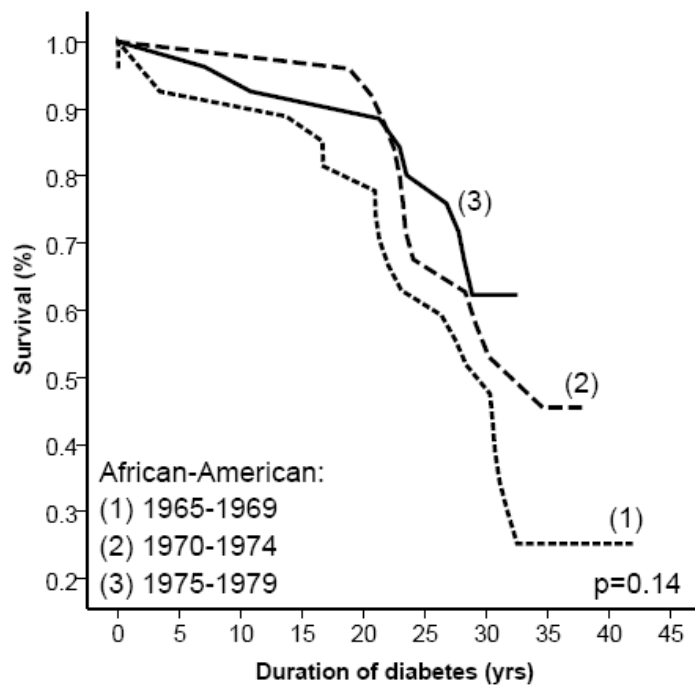

Supplement: dc101170onlineappendix.pdf [file dc101170onlineappendix.pdf]
